# Supplementary material for: Prognostic Significance of Gene Signature of Tertiary Lymphoid Structures in Patients With Lung Adenocarcinoma
Source: PubMed Central journal article supplement (PMC8352557; doi:10.3389/fonc.2021.693234), 2021-07-26

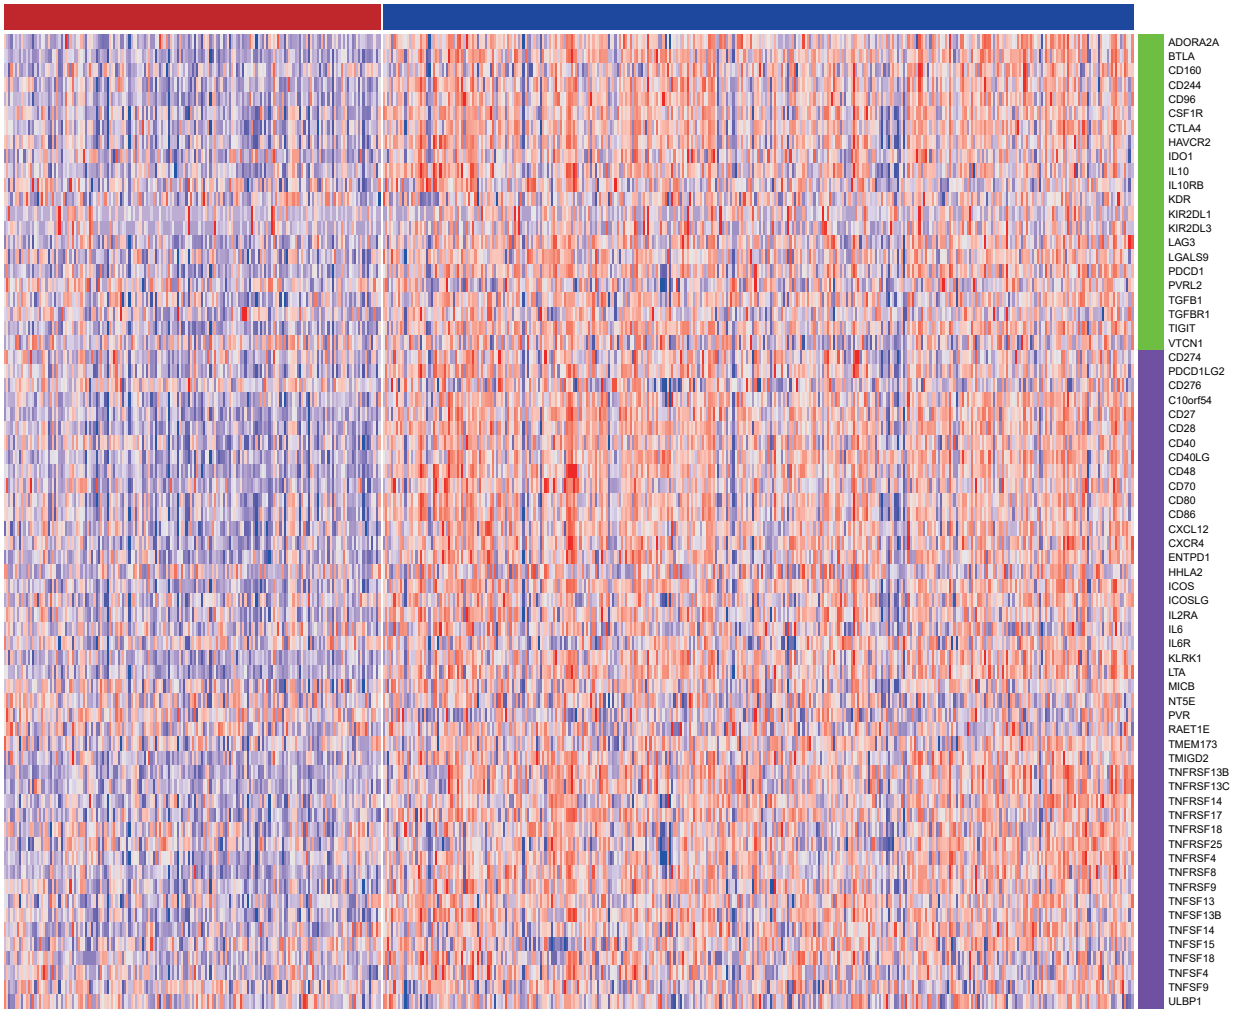

ADORA2A  
 BTLA  
 CD160  
 CD244  
 CD96  
 CSF1R  
 CTLA4  
 HAVCR2  
 IDO1  
 IL10  
 IL10RB  
 KDR  
 KIR2DL1  
 KIR2DL3  
 LAG3  
 LGALS9  
 PDCD1  
 PVR  
 TIGIT  
 VTCN1  
 CD274  
 PDCD1LG2  
 CD276  
 C10orf54  
 CD27  
 CD28  
 CD40  
 CD40LG  
 CD48  
 CD70  
 CD80  
 CD86  
 CXCL12  
 CXCR4  
 ENTPD1  
 HHLA2  
 ICOS  
 ICOSLG  
 IL2RA  
 IL6  
 IL6R  
 KLRC1  
 LTA  
 MICB  
 NTSE  
 PVR  
 RAET1E  
 TMEM173  
 TMIGD2  
 TNFRSF13B  
 TNFRSF13C  
 TNFRSF14  
 TNFRSF17  
 TNFRSF18  
 TNFRSF25  
 TNFRSF4  
 TNFRSF8  
 TNFRSF9  
 TNFSF13  
 TNFSF13B  
 TNFSF14  
 TNFSF15  
 TNFSF18  
 TNFSF4  
 TNFSF9  
 ULBP1

**group**    **type**  
■ low    ■ Immunoinhibitor  
■ high    ■ Immunostimulator

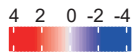

Supplement: DataSheet_4.pdf [file DataSheet_4.pdf]
