# Supplementary material for: Prognostic Significance of Gene Signature of Tertiary Lymphoid Structures in Patients With Lung Adenocarcinoma
Source: PubMed Central journal article supplement (PMC8352557; doi:10.3389/fonc.2021.693234), 2021-07-26
Supplement: DataSheet_5.pdf [file DataSheet_5.pdf]

Table S1

|                     |            | TLS signature high<br>(n=343) | TLS signature low<br>(n=172) | P value |
|---------------------|------------|-------------------------------|------------------------------|---------|
| Age (mean (SD))     |            | 66.03 (9.55)                  | 64.05 (10.56)                | 0.059   |
| Gender (%)          |            |                               |                              |         |
|                     | Male       | 190 (55.4)                    | 48 (27.9)                    | <0.001  |
|                     | Female     | 153 (44.6)                    | 124 (72.1)                   |         |
| Tumor Stage (%)     |            |                               |                              |         |
|                     | I          | 195 (56.9)                    | 80 (46.5)                    | 0.032   |
|                     | II         | 78 (22.7)                     | 44 (25.6)                    |         |
|                     | III        | 51 (14.9)                     | 33 (19.2)                    |         |
|                     | IV         | 12 ( 3.5)                     | 14 ( 8.1)                    |         |
|                     | Not known  | 7 ( 2.0)                      | 1 ( 0.6)                     |         |
| Smoking History (%) |            |                               |                              | 0.533   |
|                     | Yes        | 286 (83.4)                    | 140 (84.9)                   |         |
|                     | No         | 47 (12.2)                     | 28 (13.4)                    |         |
|                     | Not known  | 10 ( 2.9)                     | 4 ( 2.3)                     |         |
| Mutation Status     |            |                               |                              |         |
| EGFR (%)            |            |                               |                              |         |
|                     | Wild Type  | 177 (51.6)                    | 74 (43.0)                    | 0.824   |
|                     | Mutation   | 160 (46.6)                    | 95 (55.2)                    |         |
|                     | Not known  | 6 ( 1.7)                      | 3 ( 1.7)                     |         |
| TP53 (%)            |            |                               |                              |         |
|                     | Wild Type  | 177 (51.6)                    | 74 (43.0)                    | 0.079   |
|                     | Mutation   | 160 (46.6)                    | 95 (55.2)                    |         |
|                     | Not known  | 6 ( 1.7)                      | 3 ( 1.7)                     |         |
| KRAS (%)            |            |                               |                              |         |
|                     | Wild Type  | 241 (70.3)                    | 111 (64.5)                   | 0.214   |
|                     | Mutation   | 96 (28.0)                     | 58 (33.7)                    |         |
|                     | Not Report | 6 ( 1.7)                      | 3 ( 1.7)                     |         |
| BRAF (%)            |            |                               |                              |         |
|                     | Wild Type  | 307 (89.5)                    | 158 (91.9)                   | 0.449   |
|                     | Mutation   | 30 ( 8.7)                     | 11 ( 6.4)                    |         |
|                     | Not known  | 6 ( 1.7)                      | 3 ( 1.7)                     |         |
