# Supplementary material for: Prognostic Significance of Gene Signature of Tertiary Lymphoid Structures in Patients With Lung Adenocarcinoma
Source: PubMed Central journal article supplement (PMC8352557; doi:10.3389/fonc.2021.693234), 2021-07-26
Supplement: DataSheet_6.pdf [file DataSheet_6.pdf]

Table S2

|                        |           | TLS signature high<br>(n=71) | TLS signature low<br>(n=35) | P value |
|------------------------|-----------|------------------------------|-----------------------------|---------|
| Age (mean (SD))        |           | 63.62 (9.18)                 | 61.57 (9.29)                | 0.282   |
| Gender (%)             |           |                              |                             |         |
|                        | Male      | 41 (57.7)                    | 5 (14.3)                    | <0.001  |
|                        | Female    | 30 (42.3)                    | 30 (85.7)                   |         |
| Performance Status (%) |           |                              |                             |         |
|                        | 0         | 41 (57.7)                    | 24 (68.6)                   | 0.69    |
|                        | 1         | 24 (33.8)                    | 9 (25.7)                    |         |
|                        | 2         | 4 ( 5.6)                     | 2 ( 5.7)                    |         |
|                        | 3         | 2 ( 2.8)                     | 0 ( 0.0)                    |         |
| Tumor Stage (%)        |           |                              |                             |         |
|                        | I         | 50 (70.4)                    | 20 (57.1)                   | 0.238   |
|                        | II        | 12 (16.9)                    | 7 (20.0)                    |         |
|                        | III       | 8 (11.3)                     | 5 (14.3)                    |         |
|                        | IV        | 1 ( 1.4)                     | 3 ( 8.6)                    |         |
| Adjuvant Treatment (%) |           |                              |                             |         |
|                        | Yes       | 9 (12.7)                     | 6 (17.1)                    | 0.326   |
|                        | No        | 30 (42.3)                    | 10 (28.6)                   |         |
|                        | Not known | 32 (45.1)                    | 19 (54.3)                   |         |
