# Supplementary material for: Prognostic Significance of Gene Signature of Tertiary Lymphoid Structures in Patients With Lung Adenocarcinoma
Source: PubMed Central journal article supplement (PMC8352557; doi:10.3389/fonc.2021.693234), 2021-07-26

Figure S5

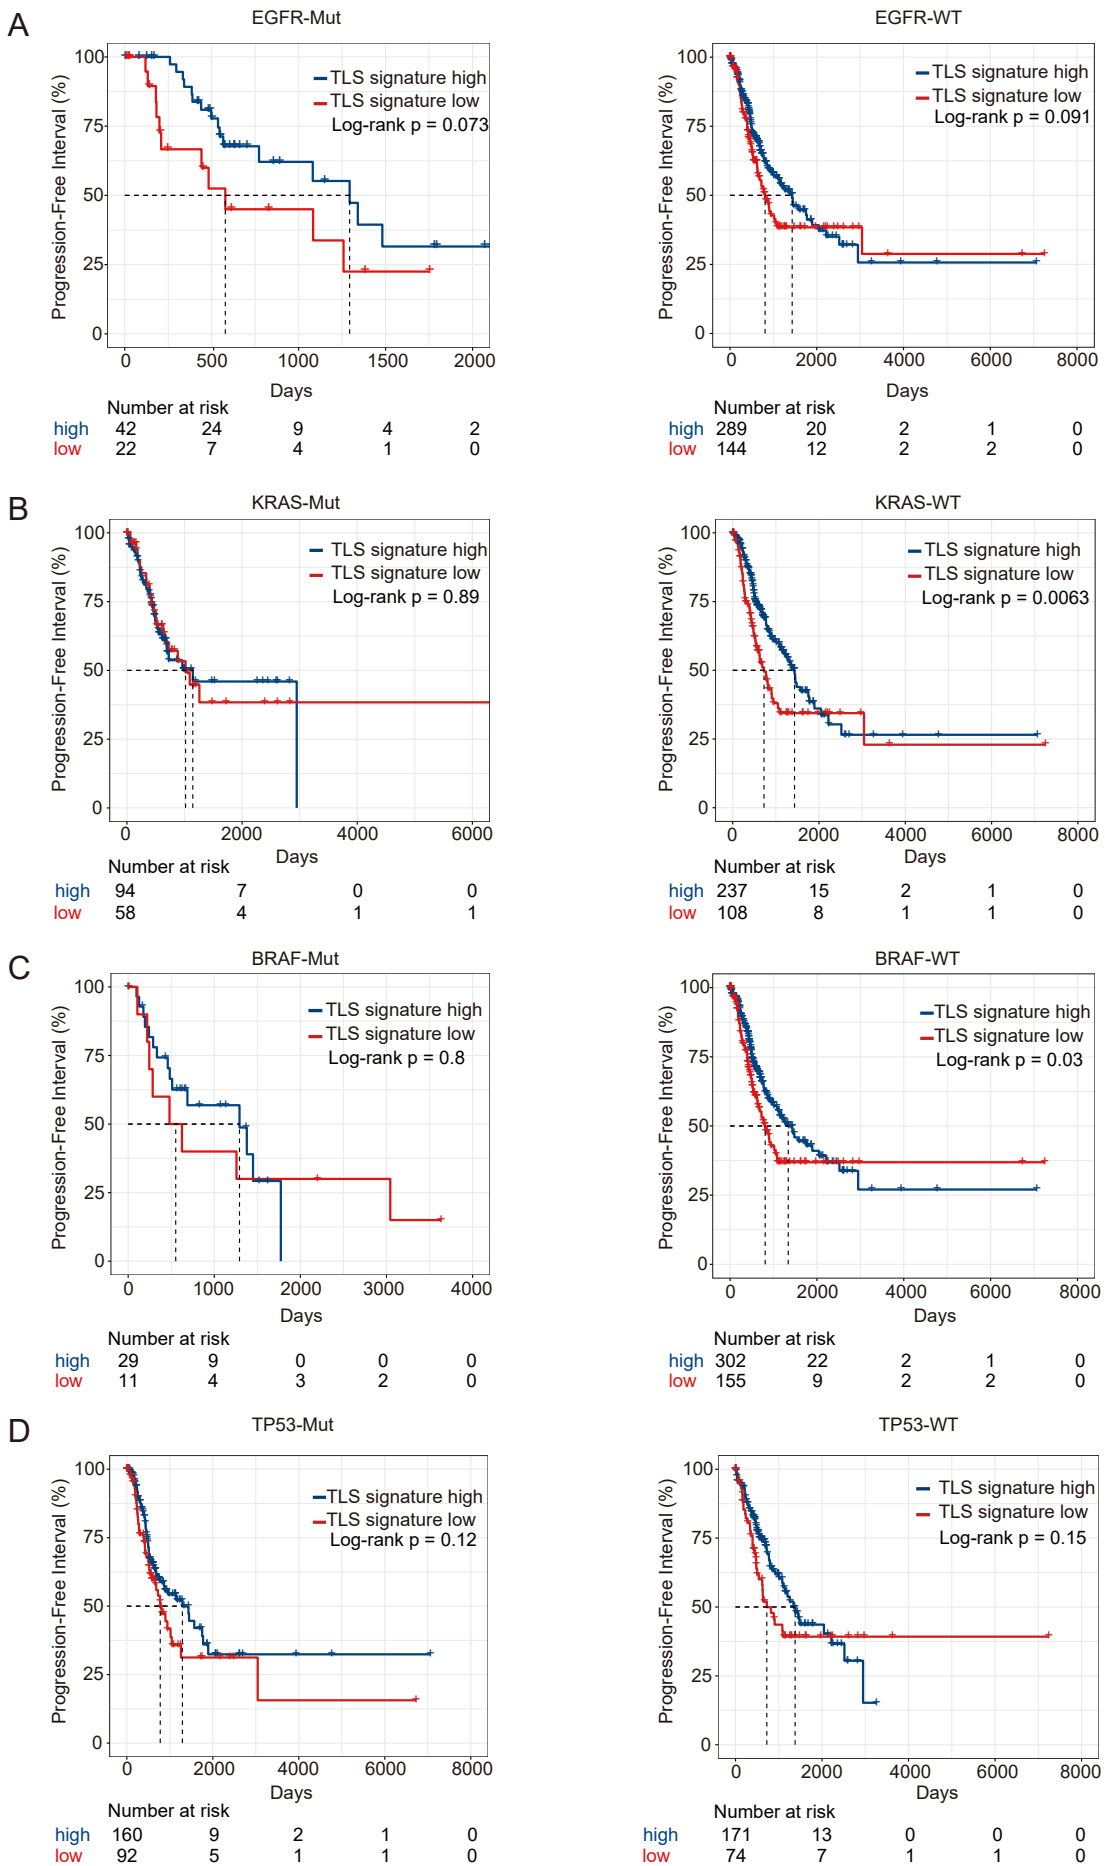

Supplement: DataSheet_7.pdf [file DataSheet_7.pdf]
